# Supplementary material for: A Stilbenoid Isorhapontigenin as a Potential Anti-Cancer Agent against Breast Cancer through Inhibiting Sphingosine Kinases/Tubulin Stabilization
Source: MDPI journal article supplement (doi:10.3390/cancers11121947), 2019-12-05

# **[Cancers] Manuscript ID: cancers-643215**

Title: A stilbenoid Isorhapontigenin as a potential anticancer agent against breast cancer through inhibiting sphingosine kinases/tubulin stabilization

Authors: Lalita Subedi, Mahesh Kumar Teli, Jae Hyuk Lee, Bhakta Prasad Gaire, Mi-hyun Kim, Sun Yeou Kim

**Original Western blot**

**Figure 1 original data**

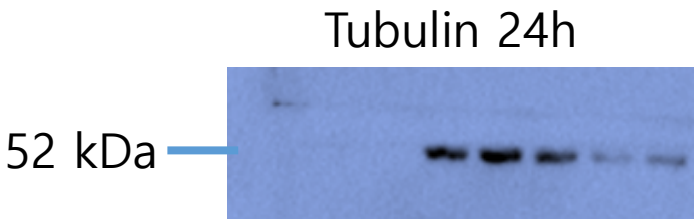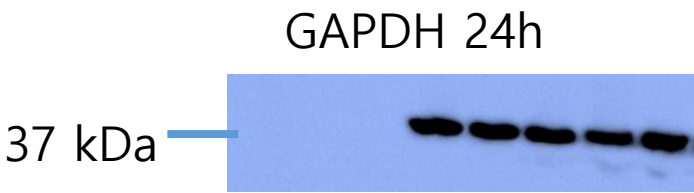

Band 1: Ctl  
Band 2: ISO 5  $\mu$ M  
Band 3: ISO 10  $\mu$ M  
Band 4: ISO 20  $\mu$ M  
Band 5: ISO 40  $\mu$ M

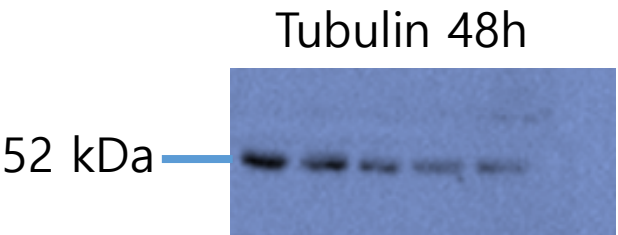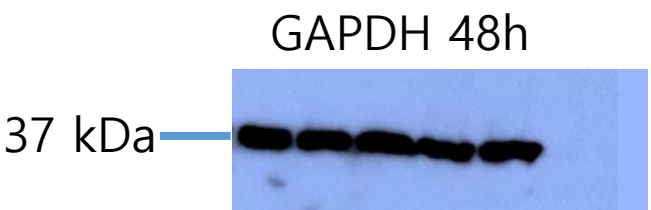

Band 1: Ctl  
Band 2: ISO 5  $\mu$ M  
Band 3: ISO 10  $\mu$ M  
Band 4: ISO 20  $\mu$ M  
Band 5: ISO 40  $\mu$ M

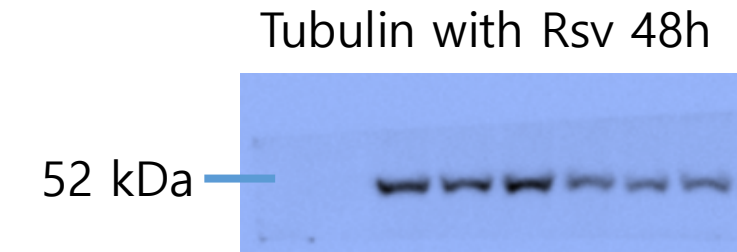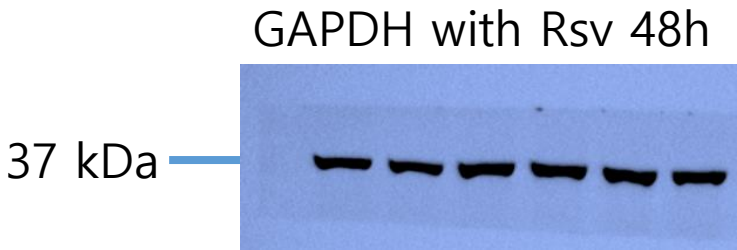

Band 1: Ctl  
Band 2: Rsv 40  $\mu$ M  
Band 3: ISO 5  $\mu$ M  
Band 4: ISO 10  $\mu$ M  
Band 5: ISO 20  $\mu$ M  
Band 6: ISO 40  $\mu$ M

**Figure 2 original data**

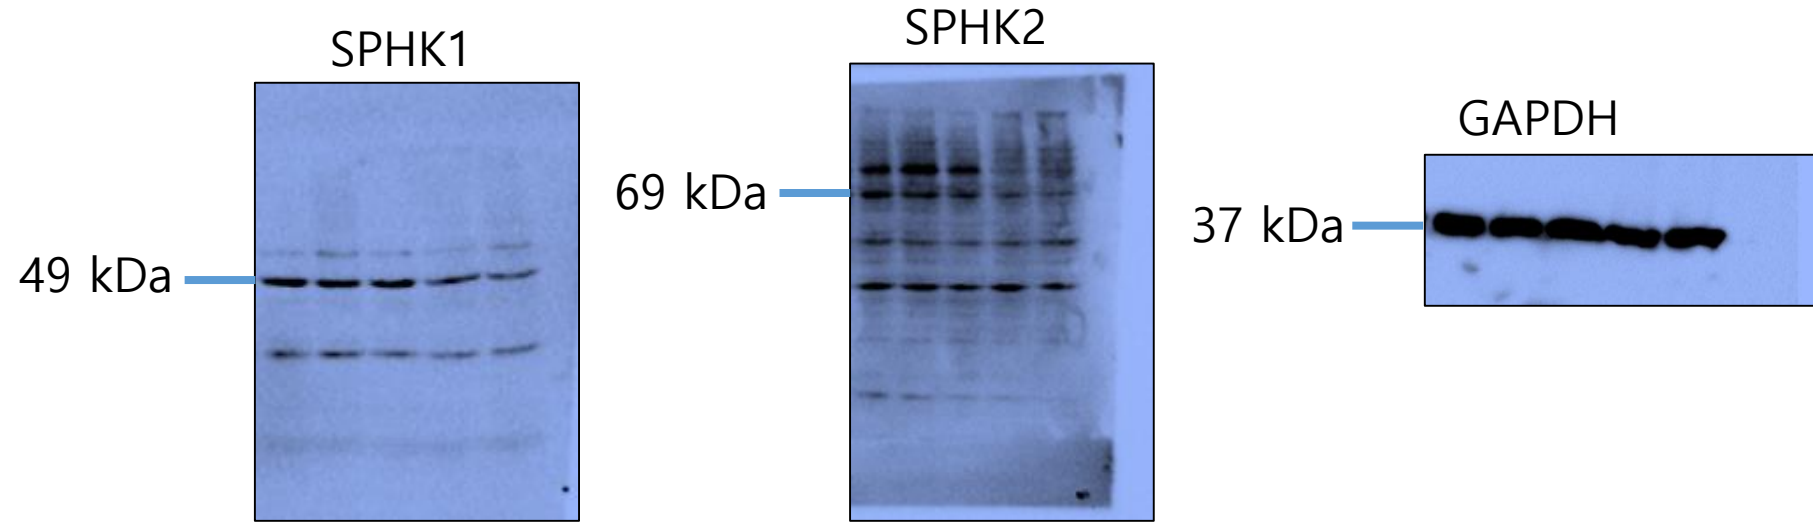

Band 1: Ctl  
Band 2: ISO 5  $\mu$ M  
Band 3: ISO 10  $\mu$ M  
Band 4: ISO 20  $\mu$ M  
Band 5: ISO 40  $\mu$ M

Note: For Manuscript we used only Ctl, ISO 20  $\mu$ M and ISO 40  $\mu$ M

**Figure 4 original data**

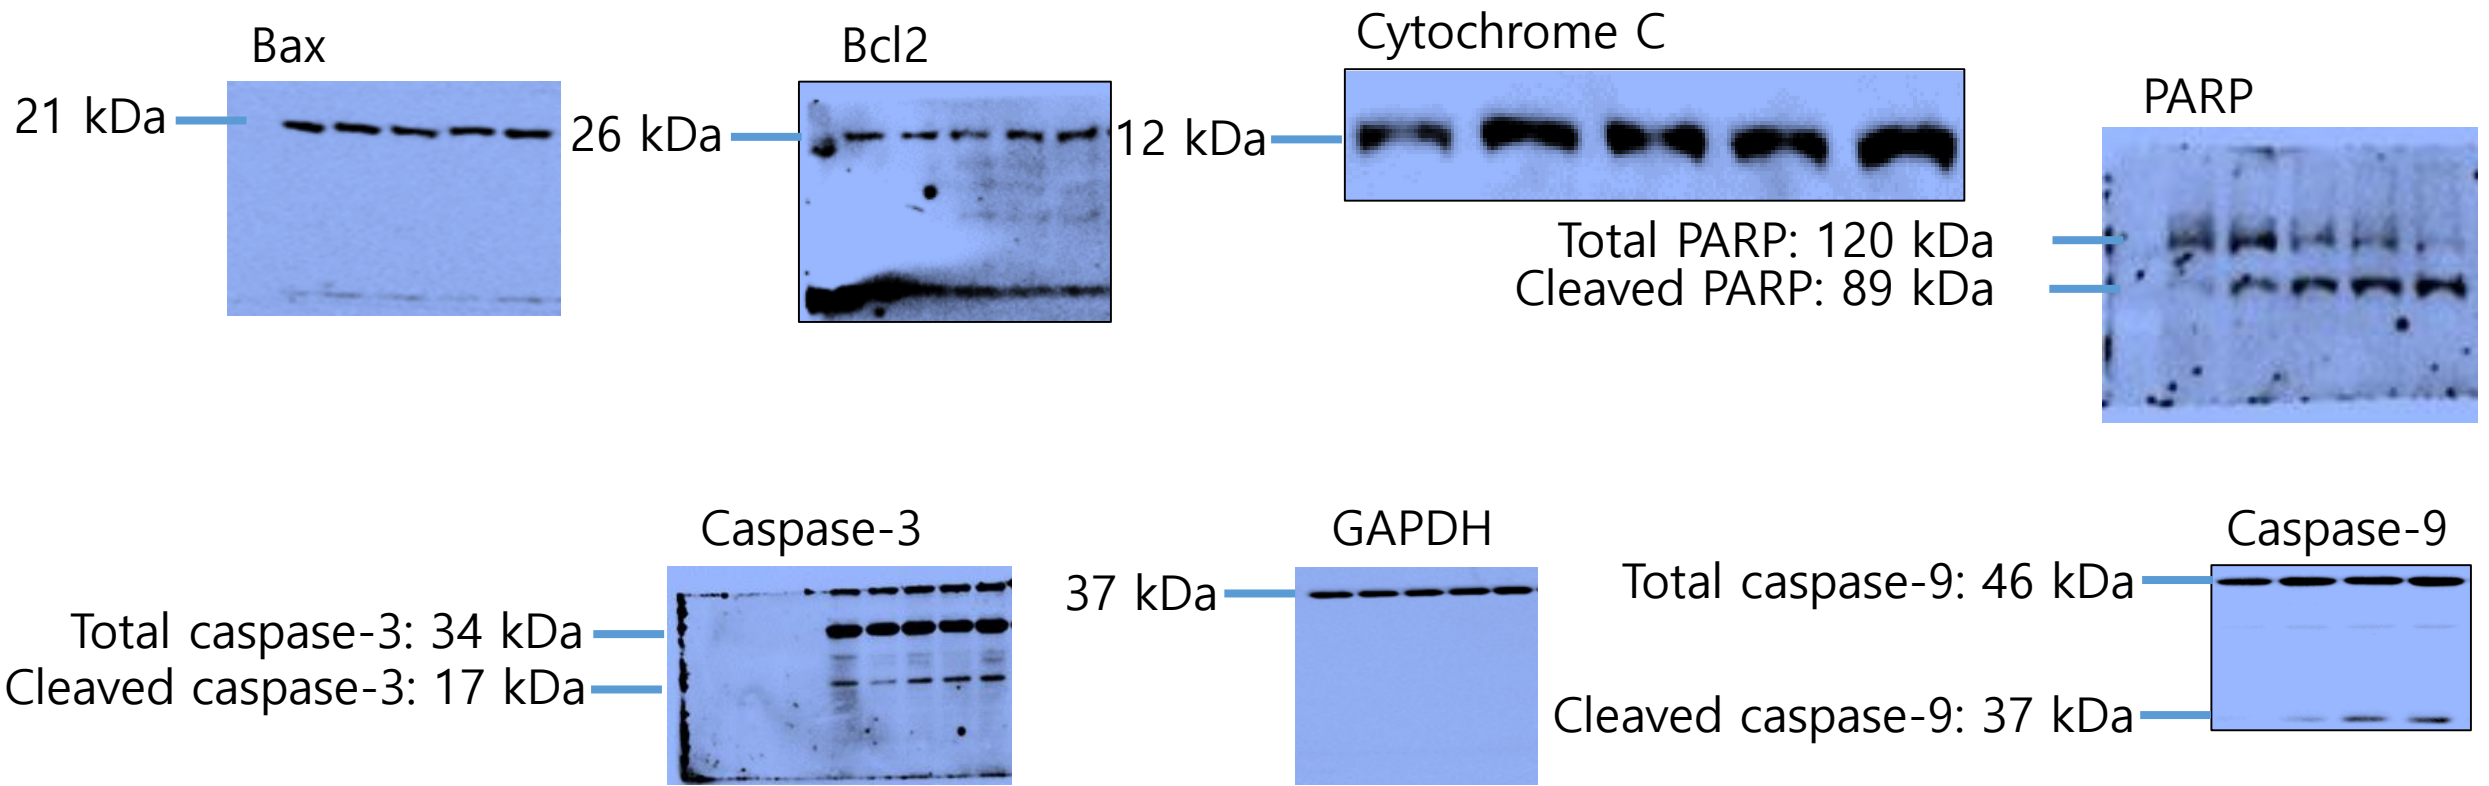

**Bax, Bcl2, Cytochrome C, PARP, Caspase-3, GAPDH**

Band 1: Ctl                      Band 2: ISO 5  $\mu$ M  
Band 3: ISO 10  $\mu$ M      Band 4: ISO 20  $\mu$ M  
Band 5: ISO 40  $\mu$ M

**Caspase-9**

Band 1: Ctl                      Band 2: ISO 10  $\mu$ M  
Band 3: ISO 20  $\mu$ M      Band 4: ISO 40  $\mu$ M

Note: For Manuscript we used only Ctl, ISO 20  $\mu$ M and ISO 40  $\mu$ M

**Figure 5 original data**

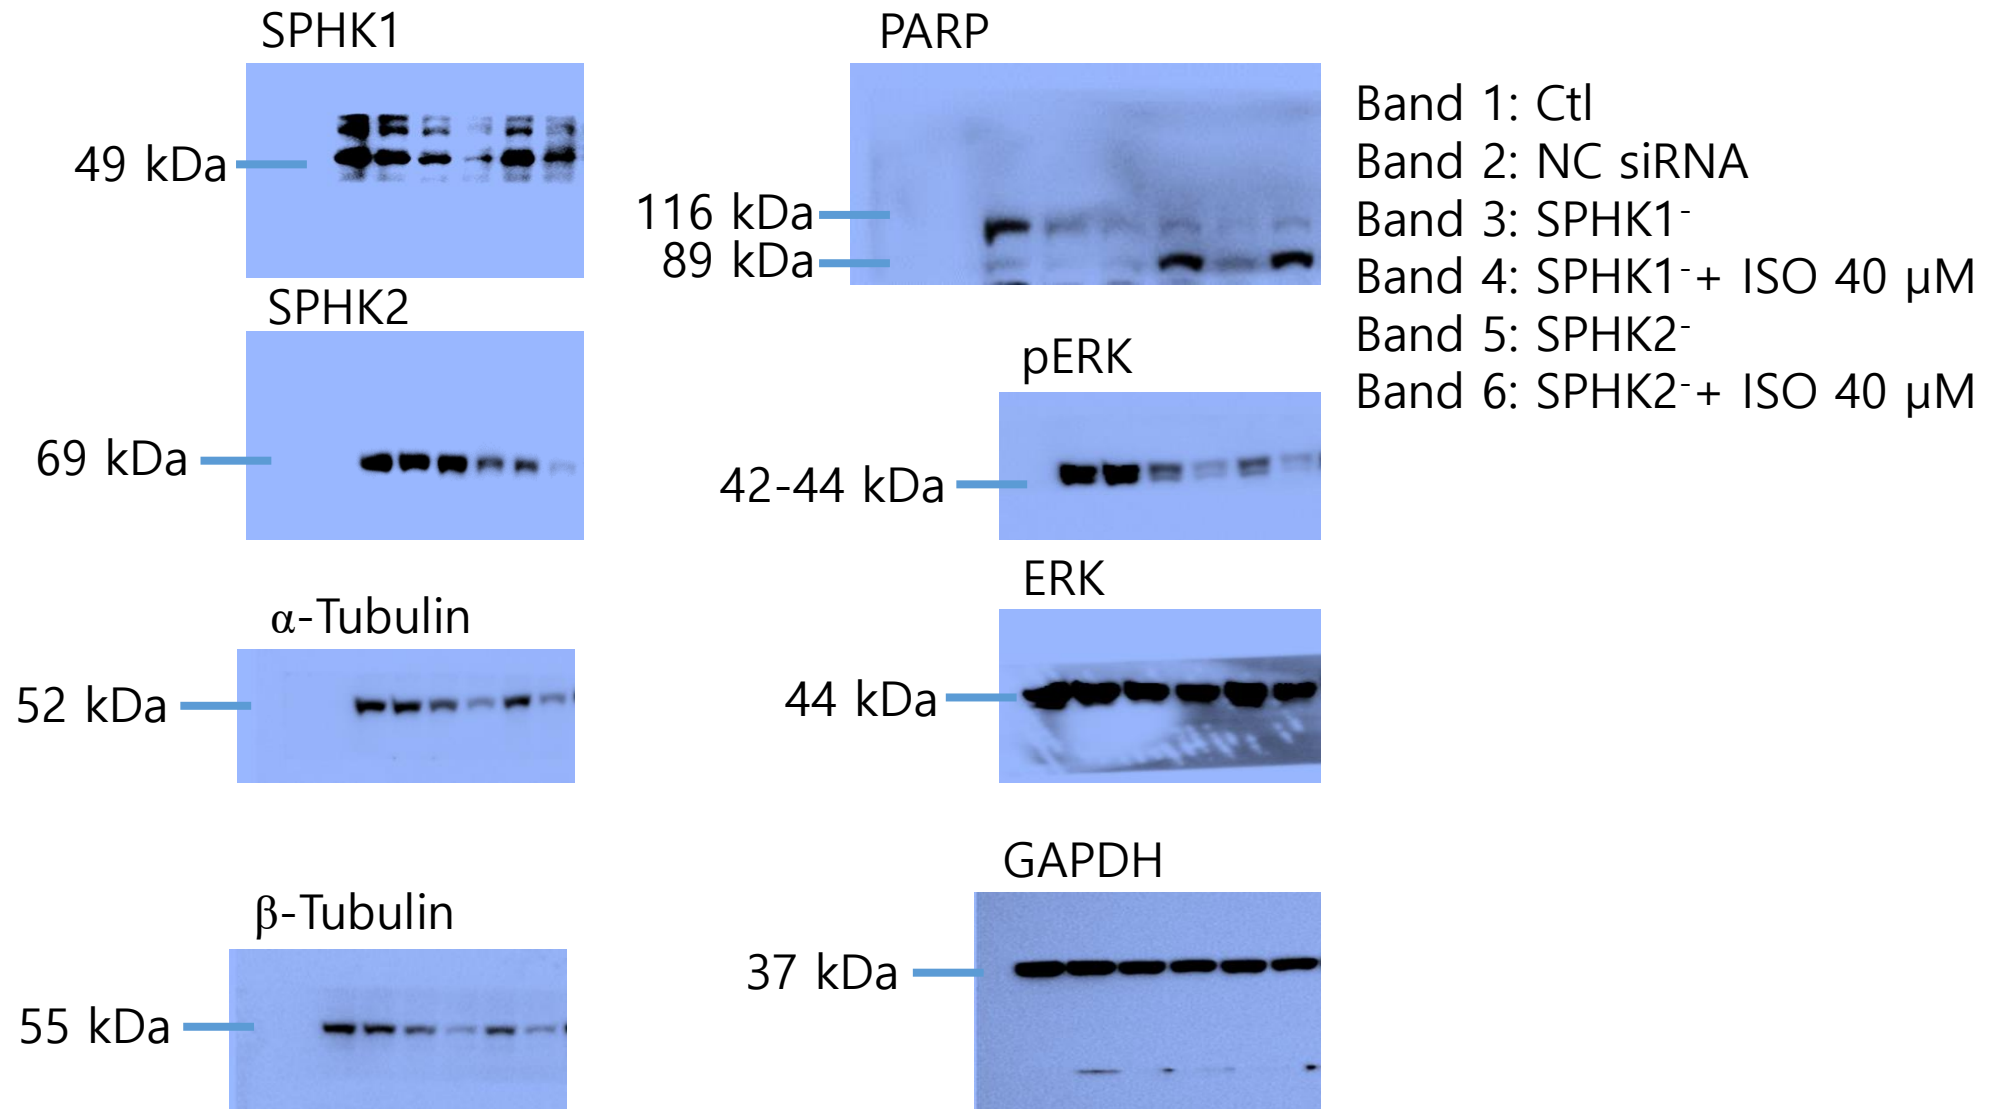

**Figure 7 original data**

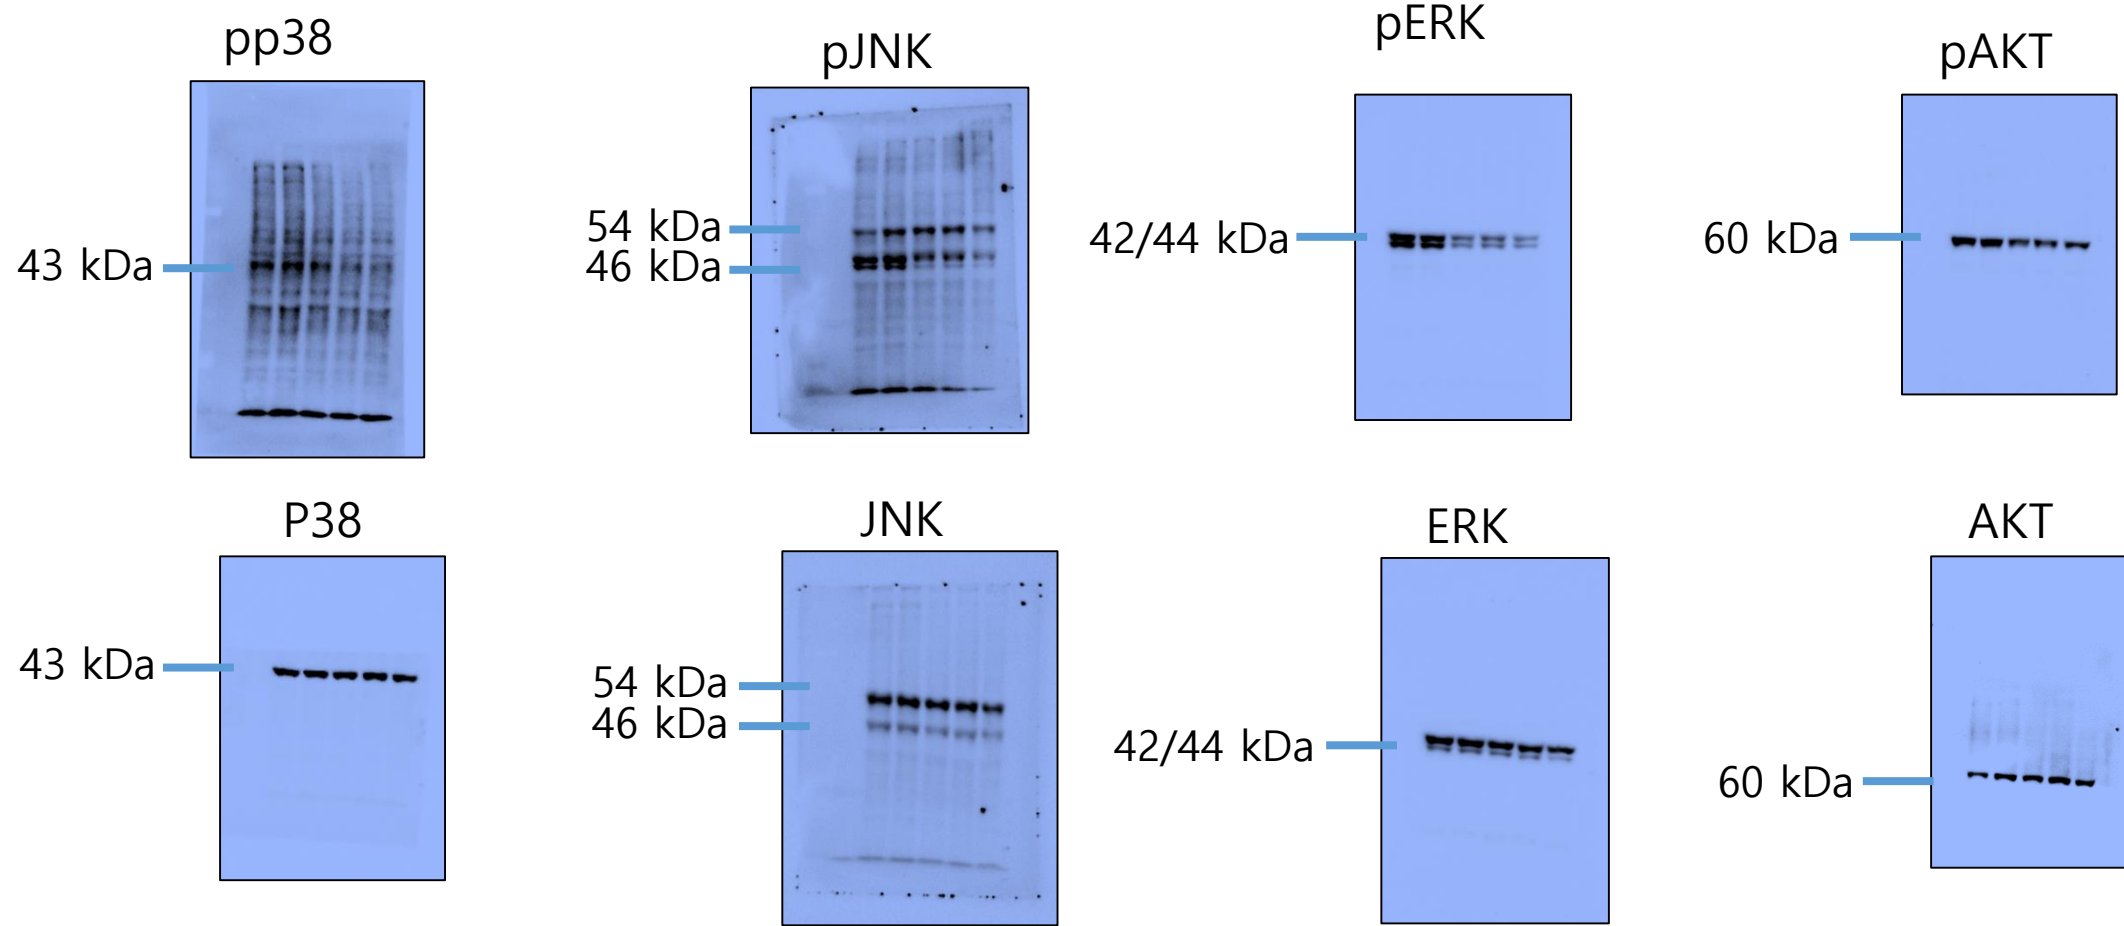

Band 1: Ctl      Band 2: ISO 5  $\mu$ M  
Band 3: ISO 10  $\mu$ M      Band 4: ISO 20  $\mu$ M  
Band 5: ISO 40  $\mu$ M

Note: For Manuscript we used only Ctl, ISO 20  $\mu$ M and ISO 40  $\mu$ M

**Figure 9 original data**

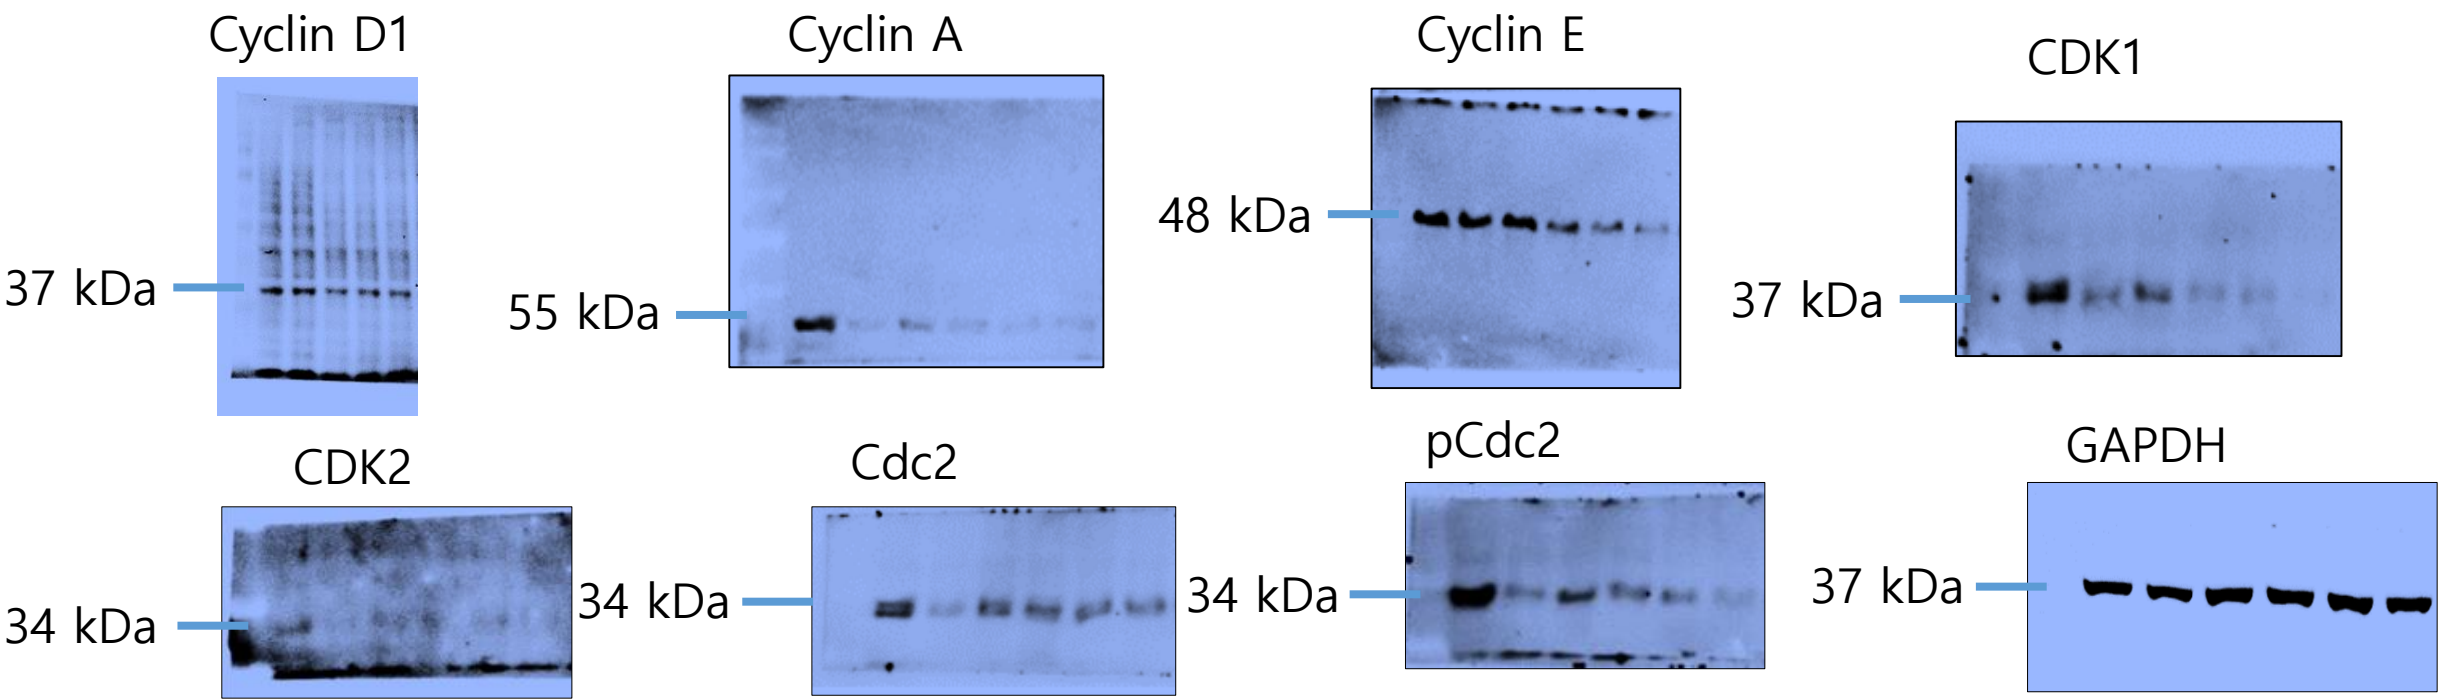

**Cyclin D1**

Band 1: Ctl  
Band 3: ISO 10  $\mu$ M  
Band 5: ISO 40  $\mu$ M

Band 2: Rsv 40  $\mu$ M  
Band 4: ISO 20  $\mu$ M

**Cyclin A, Cyclin E, CDK1, CDK2, cdc2, pcdc2, GAPDH**

Band 1: Ctl  
Band 3: ISO 5  $\mu$ M  
Band 5: ISO 20  $\mu$ M

Band 2: Rsv 40  $\mu$ M  
Band 4: ISO 10  $\mu$ M  
Band 6: ISO 40  $\mu$ M

Note: For Manuscript we used only Ctl, Rsv 40  $\mu$ M, ISO 20  $\mu$ M, and ISO 40  $\mu$ M

**Figure 10 original data**

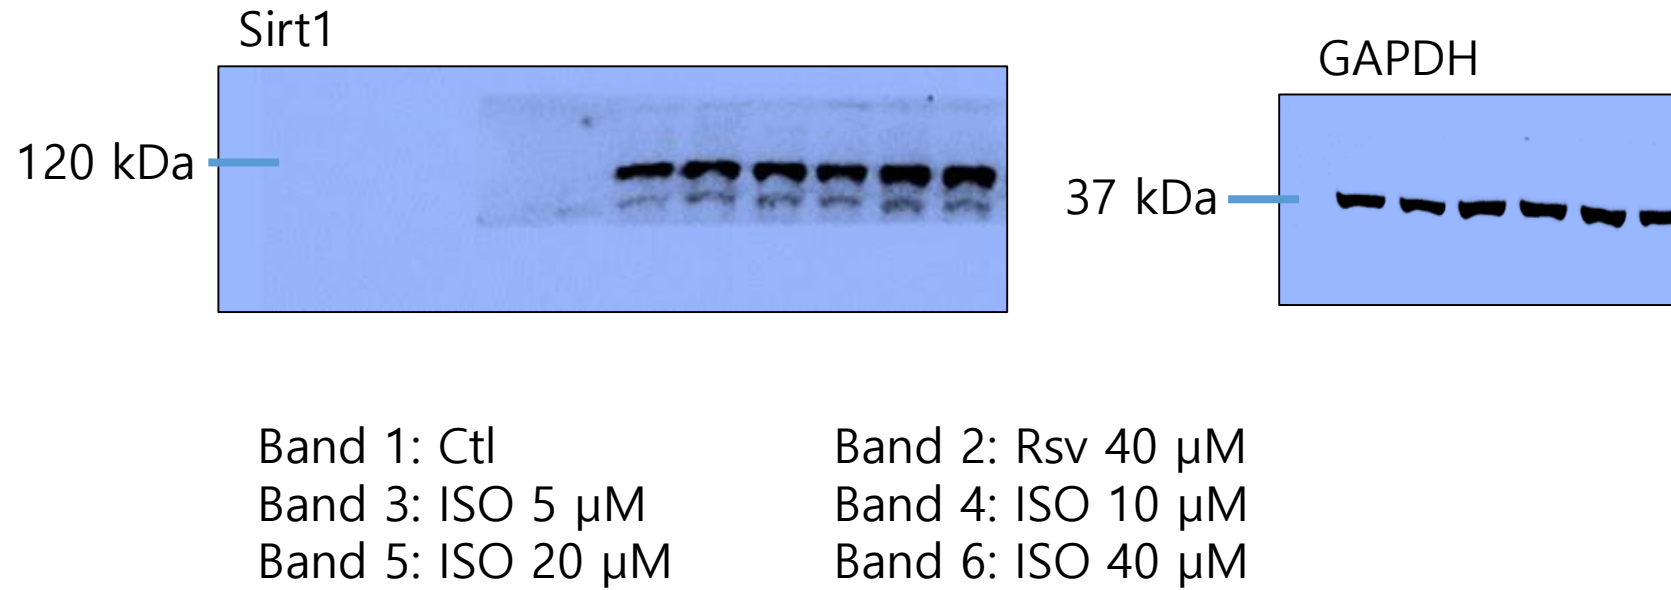



**Figure 12 original data**

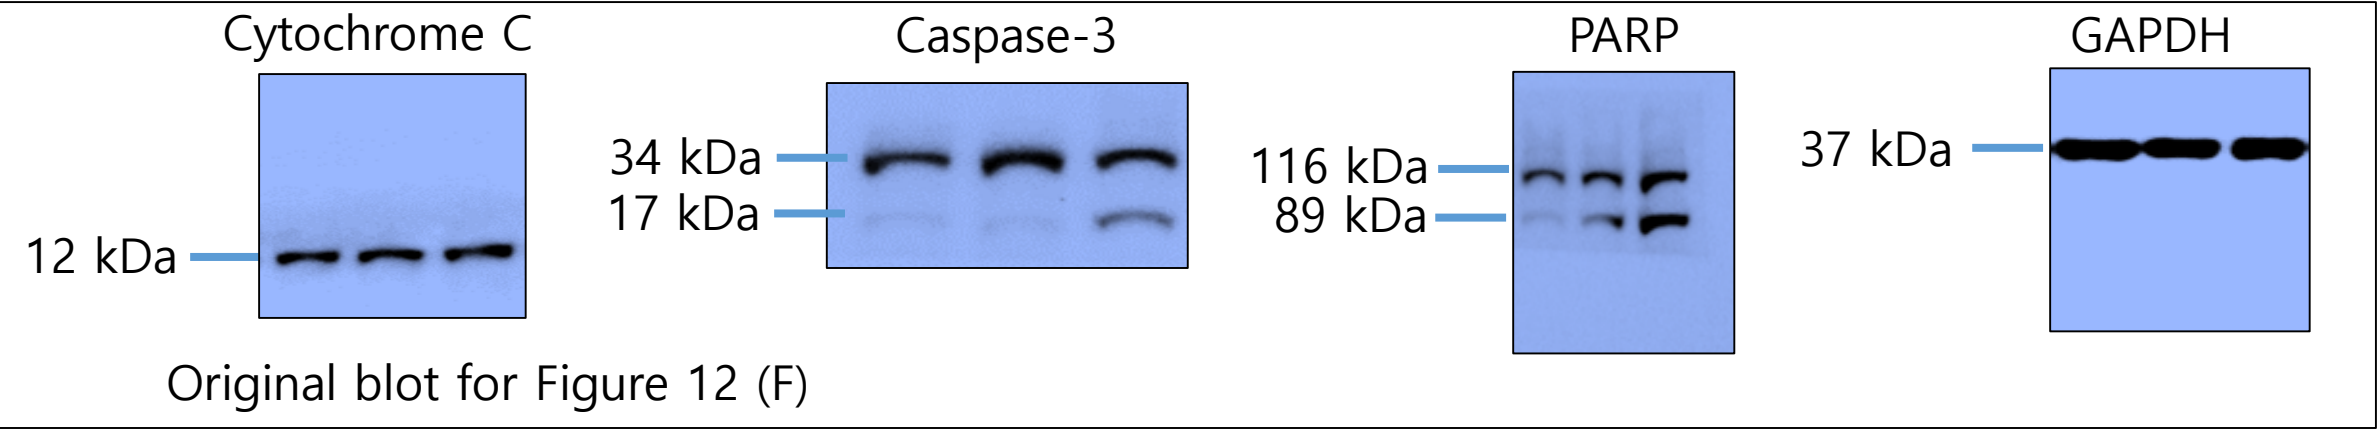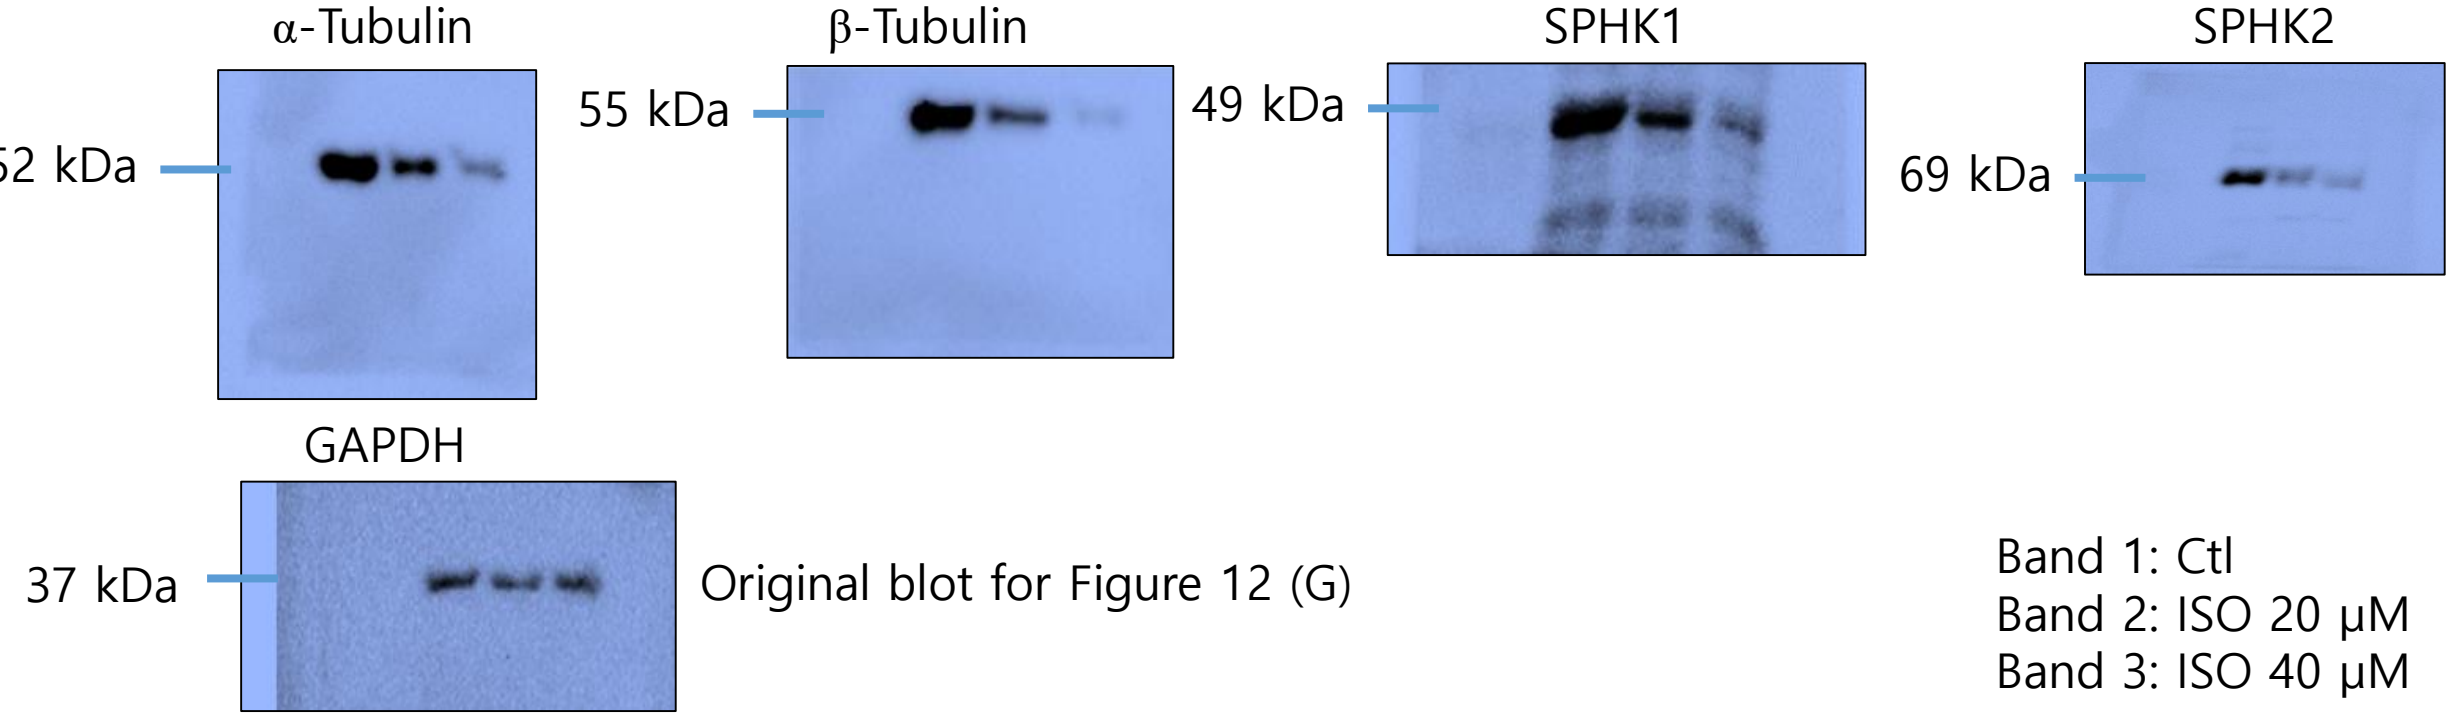

Supplement: s1 [file s1]
